# Supplementary material for: Using the Thickness Map from Macular Ganglion Cell Analysis to Differentiate Retinal Vein Occlusion from Glaucoma
Source: PubMed Central journal article supplement (PMC7602489; doi:10.3390/jcm9103294), 2020-10-14
Supplement: jcm-09-03294-s001.pdf [file jcm-09-03294-s001.pdf]

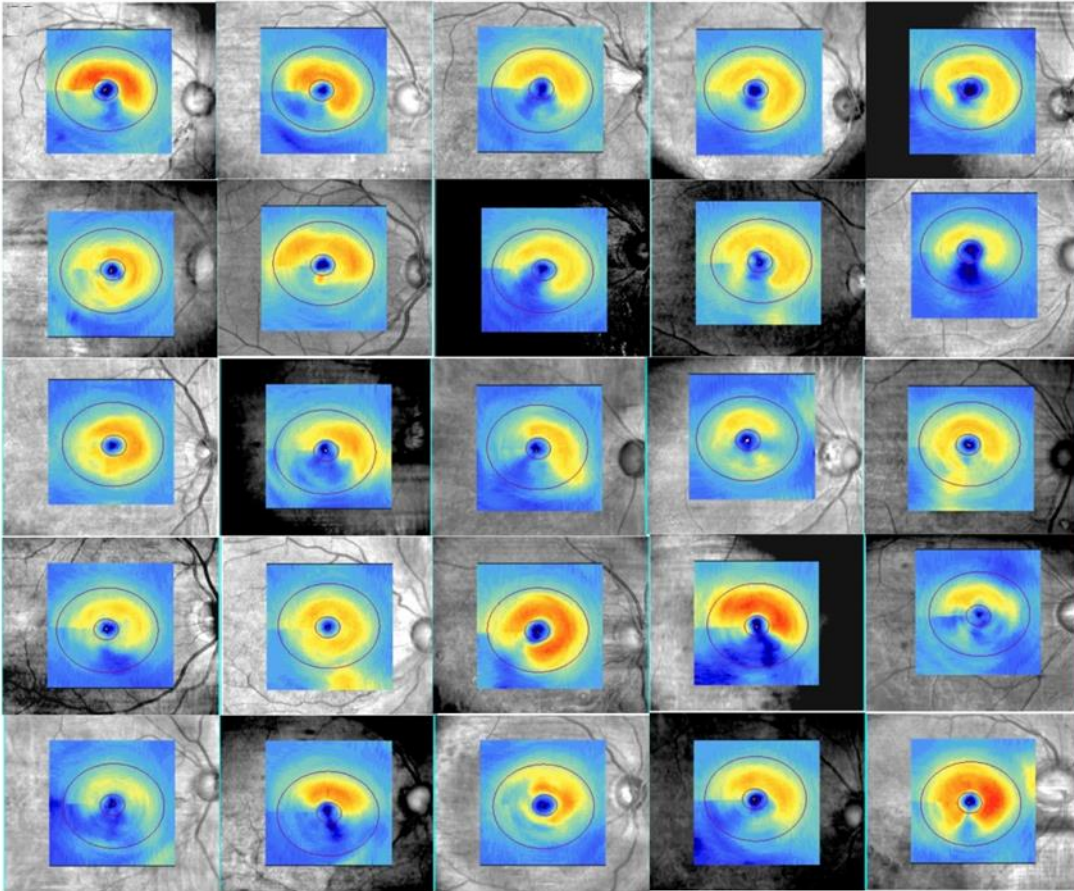

**Supplement 1.** Thickness maps of the ganglion cell analysis (GCA) of 25 retinal vein occlusion (RVO) patients diagnosed consistently as RVO by two independent examiners.

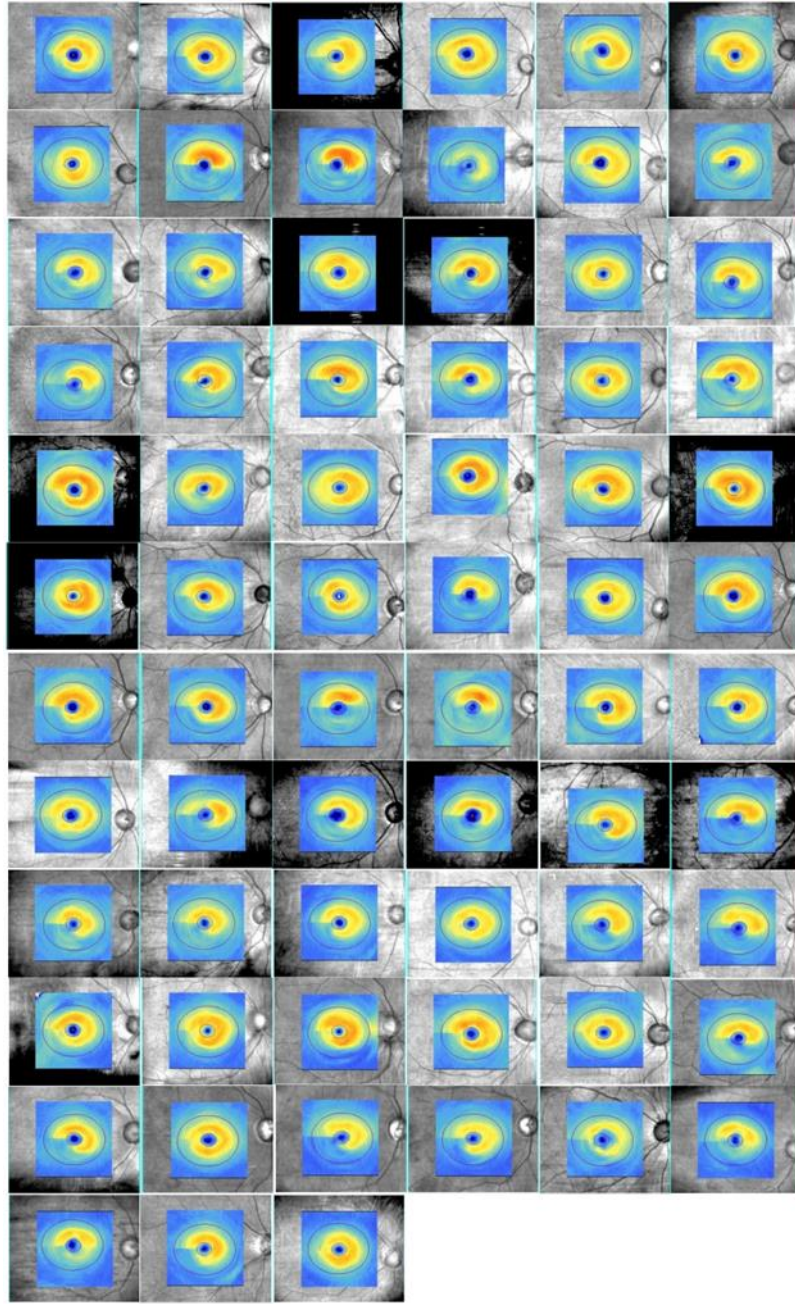

**Supplement 2.** Thickness maps of the ganglion cell analysis (GCA) of 69 primary open-angle glaucoma (POAG) patients diagnosed consistently as POAG by two independent examiners.
